# Supplementary material for: The UPR sensor IRE1α and the adenovirus E3-19K glycoprotein sustain persistent and lytic infections
Source: PubMed Central journal article supplement (PMC7181865; doi:10.1038/s41467-020-15844-2), 2020-04-24
Supplement: 41467_2020_15844_MOESM1_ESM.pdf [file 41467_2020_15844_MOESM1_ESM.pdf]

1  
2  
3  
4  
5  
6  
7  
8  
9

# Supplementary Information

**The UPR sensor IRE1 $\alpha$  and the adenovirus E3-19K glycoprotein sustain persistent and lytic infections**

Prasad et al.

## 10 **Supplementary figures and legends**

### 11 **Supplementary Figure 1: Construction and characterization of the HeLa I-KO** 12 **cells, and depiction of the IRE1 $\alpha$ activation assay measuring XBP1 splicing.** 13 **(Relates to Figure 1).**

14 a. Schematics showing the genomic locus targeted by the guide RNA for the construction of  
15 IRE1 $\alpha$  knock-out HeLa cells (HeLa I-KO) by CRISPR-Cas9.

16 b. Mutations in the monoclonal HeLa I-KO cells introduced by CRISPR/Cas9 to the three  
17 alleles of IRE1 $\alpha$  in HeLa cells. An insertion of an adenosine (A), and a 23-nucleotide (nt)  
18 deletion, respectively, resulted in out-of-frame modifications, whereas a 15-nt deletion caused  
19 an in-frame deletion.

20 c. Cell-associated AdV-C5 and nuclear import of incoming viral DNA are not affected in HeLa  
21 I-KO cells (n=15 for HeLa and n=12 for HeLa I-KO). Nuclear vDNA was scored as hexon-free  
22 vDNA puncta over the DAPI mask. Centre line of the box plot indicates median with 1<sup>st</sup> and 3<sup>rd</sup>  
23 quartiles and whiskers shown as boxes and lines, respectively. Significance was assessed  
24 with two-tailed Wilcoxon non-parametric test. Scale bar, 10  $\mu$ m.

25 d. XBP1 splicing assay and the formula to determine the percentage of spliced XBP1 {Han,  
26 2009, 19665977}. The T7 endonuclease removes the hybrid XBP-1u-1s band (\*) above the 1s  
27 band (two panels on the right). Four independent experiments gave similar results.

28 e. XBP1 splicing is enhanced in AdV-C2 and C5 infection of HeLa cells (MOI 75). \* denotes a  
29 background product. Three independent experiments gave similar results. Source data are  
30 provided as a source data file.

31 f. Splicing of XBP1s induced by Golgicide A (GCA) requires IRE1 $\alpha$ . HeLa I-KO cells show  
32 lesser XBP1 splicing than wild type HeLa cells upon 5 h incubation with GCA (20  $\mu$ M). Three  
33 independent experiments gave similar results.

34 g. Induction of XBP1s occurs in AdV-C5 infected WI38 cells (MOI 75). Three independent  
35 experiments gave similar results.

36

**a** Construction of IRE1 $\alpha$  KO cells by CRISPR/Cas9

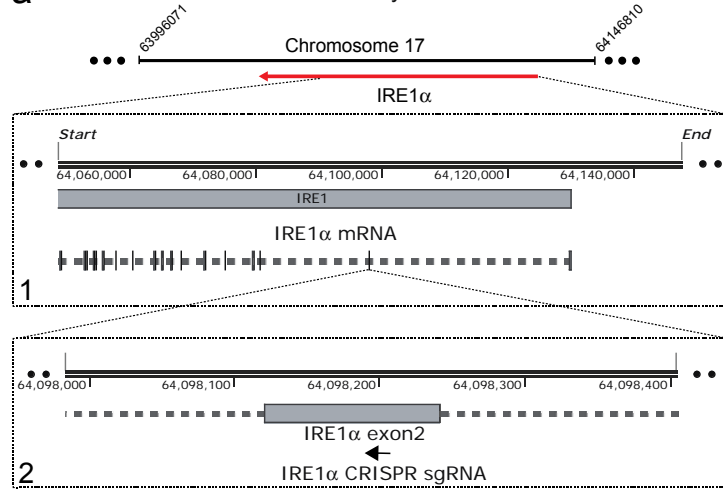

**b** Mutations in IRE1 $\alpha$  exon 2

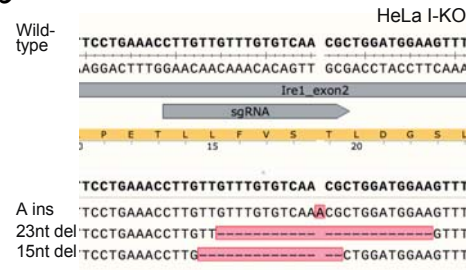

**e** Enhanced XBP1s by AdV-C2 & C5

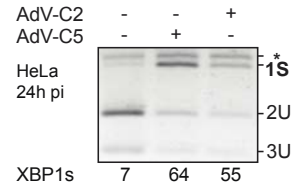

**c** IRE1 $\alpha$  knock-out does not impair vDNA nuclear import

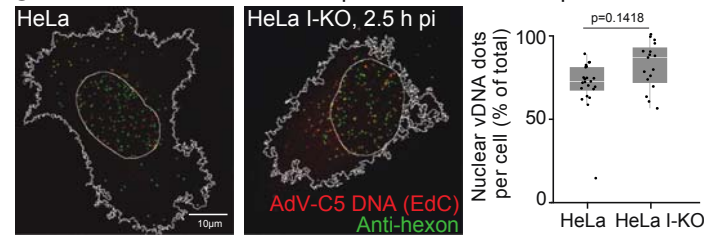

**f** Chemical XBP1s induction requires IRE1 $\alpha$

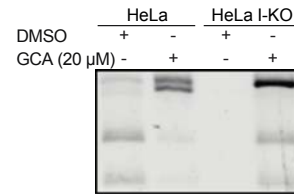

**d** XBP1 mRNA splicing assay

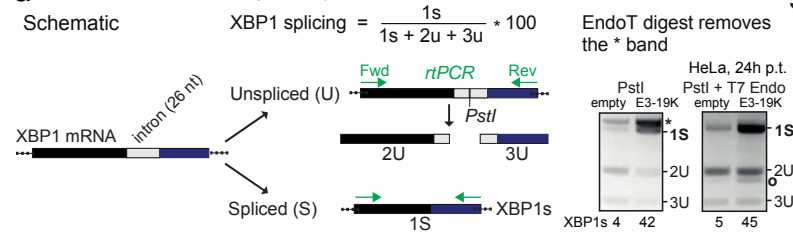

**g** XBP1s induction in human 2n cells

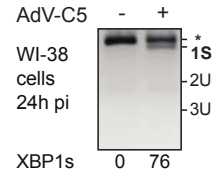

39 **Supplementary Figure 2: Displacement of BiP/Grp78 from IRE1 $\alpha$  by AdV, and**  
40 **attenuation of IRE1 $\alpha$  activation by ectopic expression of BiP/Grp78 in canonical**  
41 **UPR. (Relates to Figure 2d, e).**

42 a. AdV infection does not induce RIDD. HeLa cells were either treated with DTT (2 and 10  
43 mM) for 4 h or infected with AdV-C5 for 24 and 48 h. Total RNA was extracted and XBP1s and  
44 human Bloc1S1 mRNA levels were measured relative to GAPDH and TBP. Data present the  
45 means  $\pm$  SD from three independent experiments. Source data are provided as a source  
46 data file.

47 b. BiP-IRE1 $\alpha$  dissociation and XBP1s correlate in conventional UPR. Co-immunoprecipitation  
48 of Flag-IRE1 $\alpha$  and BiP in IRE1 $\alpha$ -KO MEFs expressing Flag-IRE1 $\alpha$  upon treatment with DTT  
49 (10mM) for 1, 2 and 4h and immunoblotting with anti-IRE1 $\alpha$ , anti-BiP/Grp78 and anti- $\beta$ -tubulin  
50 antibodies. Aliquots of the corresponding cells were also analysed for XBP1 splicing, and  
51 results expressed as % XBP1s. Two independent experiments gave similar results. Source  
52 data are provided as a source data file.

53 c. BiP-IRE1 $\alpha$  dissociation in AdV infection of HeLa cells. Lentivirus expressing full-length Flag-  
54 IRE1 $\alpha$  was transduced in HeLa I-KO cells for 48 h, followed by DTT treatment for 1 h, or AdV-  
55 C5 infection for 4 h (MOI 200). Co-immunoprecipitation of BiP-Flag-IRE1 $\alpha$  followed by  
56 immunoblots was performed as described in (a). The results show that ectopic overexpression  
57 of IRE1 $\alpha$  increases XBP1 splicing. AdV infection dissociates BiP from IRE1 $\alpha$  without  
58 increasing XBP1 splicing, while DTT treatment dissociates BiP from IRE1 $\alpha$  and increases  
59 XBP1 splicing. \*\* denotes a background product. Two independent experiments gave similar  
60 results. Source data are provided as a source data file.

61 d. Time-course of XBP1 splicing induction in HeLa cells, infected with AdV-C5 (MOI 200) for 4,  
62 8 and 16 h. Three independent experiments gave similar results. Source data are provided as  
63 a source data file.

64 e. Ectopic expression of BiP/Grp78 does not reduce XBP1 splicing in AdV infection. Control  
65 and HeLa cells transfected with BiP/Grp78 were infected with AdV-C2 for 24 and 48 h, and  
66 analyzed by Western blotting for BiP expression relative to GAPDH, as well as XBP1 splicing  
67 was analysed in the corresponding samples. Three independent experiments gave similar  
68 results. Source data are provided as a source data file.

69 f. Ectopic expression of BiP/Grp78 attenuates IRE1 $\alpha$  activation in conventional UPR. Control  
70 and BiP overexpressing HeLa cells were treated with Tg (10  $\mu$ M) for indicated times, and  
71 XBP1 splicing was analysed. Two independent experiments gave similar results.

**a** No RIDD induction in AdV infection

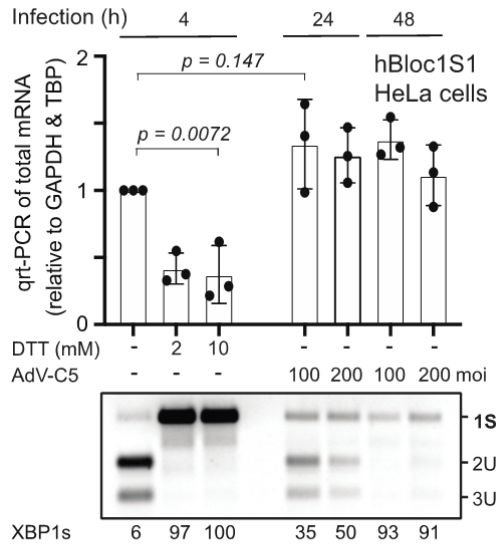

**b** BiP-IRE1 $\alpha$  dissociation & XBP1s correlate in conventional UPR

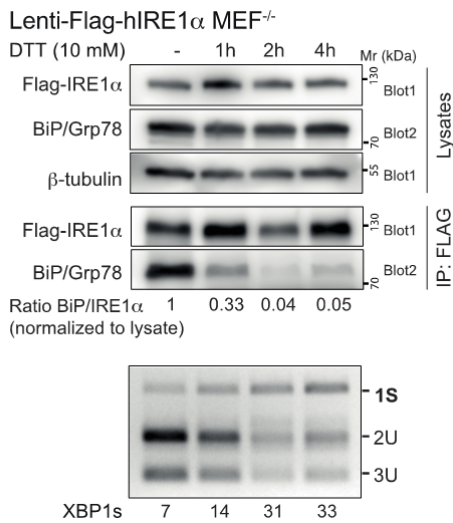

**c** BiP-IRE1 $\alpha$  dissociation early in AdV infection of HeLa cells

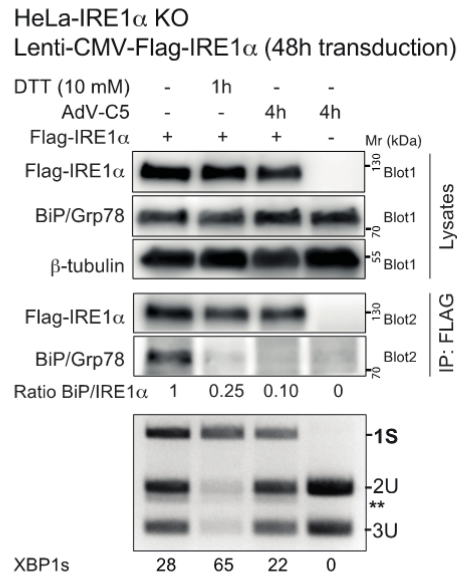

**d** No XBP1s early in AdV infection of HeLa cells

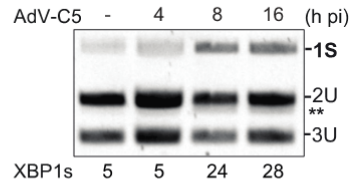

**e** Ectopic expression of BiP/Grp78 does not reduce XBP1s in AdV infection

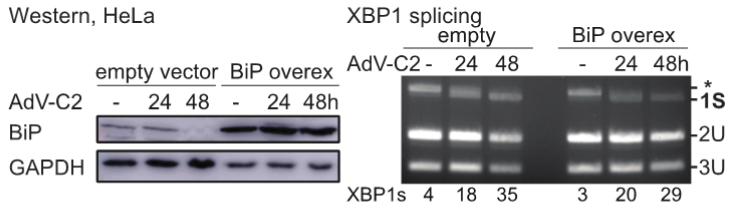

**f** Ectopic expression of BiP/Grp78 reduces XBP1s in conventional UPR (thapsigargin)

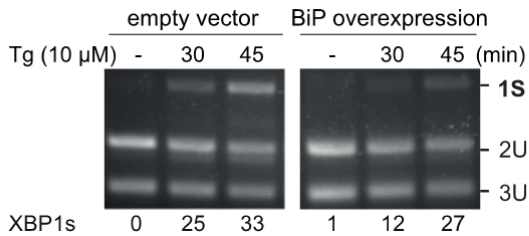

72

73

74

75 **Supplementary Figure 3: E1A and E3-19K (19K) are required for IRE1 $\alpha$  activation**  
76 **in AdV-C infection, as indicated by chemical inhibitors, RNA interference, AdV**  
77 **mutants and ectopic expression of 19K. (Relates to Figure 3).**

78 a. Viral replication is not required for IRE1 $\alpha$  activation. HeLa cells were infected with AdV-C5  
79 (MOI 50) in the presence or absence of the viral replication inhibitor cytosine arabinoside  
80 (AraC, 16  $\mu$ M) {Yamashita, 1974, 4850436}. Ethynyl-cytosine (EdC, 2.5  $\mu$ M) was added for 4 h  
81 before fixation 24 h pi. Viral replication centers with incorporated EdC were stained with azide-  
82 Alexa488 by copper-catalyzed click reaction, and imaged by high-throughput microscopy  
83 including DAPI for the cell nuclei (left panel). Scale bar, 50  $\mu$ m. Inhibition of AdV replication did  
84 not affect E1A expression (middle panel). Parallel samples with the same amount of virus and  
85 AraC was lysed at 24 h pi and immunoblotted with the anti-E1A antibody M73, or analysed for  
86 XBP1 splicing (right panel). \* denotes a background product. Three independent experiments  
87 gave similar results. Source data are provided as a source data file.

88 b. HeLa cells were infected with AdV-C5 (MOI 50) in the presence of AraC (16  $\mu$ M) and  
89 flavopiridol (FLV) (250 nM) for 24 h. Cells were fixed and stained with an anti-E1A antibody  
90 (M58) and parallel samples were used for XBP1 splicing assay. Scale bar, 50  $\mu$ m. Two  
91 independent experiments gave similar results. Source data are provided as a source data file.

92 c. Schematic of AdV-C5 mutants dl327 and dl309 and their respective regions of deletion (top  
93 panel). Mutant dl309 has deletion in the E3B locus and dl327 has most of the E3A and E3B  
94 loci deleted. HeLa cells were infected with equivalent amounts of median physical virus  
95 particles of C5, C5-dl327 and C5-dl309 and stained for E1A (M58) and 19K (Tw1.3) 24 h pi.  
96 Scale bar, 50  $\mu$ m. For verification of the deleted region, PCR was performed with the indicated  
97 primers, followed by sequencing of the PCR fragment (bottom right panel). Note that the dl309  
98 mutant contains stuffer DNA in place of E3B genes, and shows an approximate reduction of  
99 100 bp in the diagnostic PCR band. Three independent experiments gave similar results.

100 d. Deletion of 19K reduces XBP1 induction by AdV-C5. AdV-C5 wild-type and mutant with  
101 deletion in 19K gene was used to infect HeLa cells (MOI 100 each). Samples were collected  
102 and analysed for XBP1 splicing at 24 and 48h post infection. Results from two different  
103 experiments are plotted in the graph. Right panel shows the absence of 19K expression in  
104 AdV-C5-d19K virus. Data present the means from two independent experiments. Source data  
105 are provided as a source data file.

106 e. RNAi against E3 reduces 19K levels and IRE1 $\alpha$  activation as measured by XBP1s (left  
107 panel). HeLa cells were transfected with 10 nM siPools against the 19K of AdV-C5 for 48 h,  
108 and infected with AdV-C5 (MOI 75) for 24 h. Cells were either fixed with PFA and

109 immunostained for E1A (M73) or processed for XBP1s splicing assay (n=33217 and  
110 33118 for siNeg1 and si19K, respectively). Centre line of the box plot indicates median and 1<sup>st</sup>  
111 and 3<sup>rd</sup> quartiles and whiskers shown as boxes and lines, respectively. Test of significance  
112 was performed with two-tailed Wilcoxon non-parametric test. Scale bar, 100  $\mu$ m. siPools  
113 against the *E4* locus of AdV-C5 showed no effect on virus induction of XBP1s. Representative  
114 images visualizing 19K and GFP-E4orf4 show the specificity of *E3* and *E4* RNAi in AdV-C5  
115 and AdV-C5\_GFP-E4orf4 infections at MOI 75 and 150, respectively. Scale bar, 100  $\mu$ m.  
116 Source data are provided as a source data file.

117 f. Expression constructs of the *E3A* region and mutants used in this study. Premature  
118 termination of *E3A* region genes by the insertion of dual stop codons TAATAG after the  
119 initiating methionine was performed for the *12.5K*, *7.1K*, *19K* and *ADP* open reading frames. A  
120 further deletion of the transmembrane domain of ADP was included to prevent the expression  
121 of truncation forms. Experiment showing the activation of IRE1 $\alpha$  (XBP1 splicing) by the *12.5K*  
122 STOP mutant was performed as described in Figure 3c. Source data are provided as a source  
123 data file.

124 g. Schematic of AdV-C2 19K luminal domain (LD) deletion construct, and XBP1s splicing  
125 showing that the luminal domain of 19K is required for IRE1 activation. HeLa cells expressing  
126 Flag-tagged full length (FL) and luminal domain (LD) of 19K were fixed with PFA and  
127 immunostained for Flag. Representative images show reticular staining patterns from  
128 expression of Flag-tagged 19K FL and LD constructs at low magnification (Scale bar, 100  $\mu$ m,  
129 fluorescence micrographs). Three independent experiments gave similar results. Source data  
130 are provided as a source data file.

131 h. ER retention motif of C2 19K-LD is not required for XBP1 splicing. HeLa cells expressing  
132 Flag-tagged luminal domain (LD) constructs of C2 19K-LD with or without the retention signal  
133 HDEL were fixed with PFA and immunostained for Flag. Parallel samples were analysed for  
134 XBP1 splicing. Expression efficiency is depicted as percentage of Flag-expressing cells and  
135 representative images show reticular staining pattern of these constructs (Scale bar, 100 and  
136 50  $\mu$ m for overview and zoomed in fluorescence micrographs respectively). Data represent the  
137 means from two independent experiments. Source data are provided as a source data file.

138 i. AdV-C2 19K activates IRE1 $\alpha$  more effectively than AdV-D8 19K. HeLa cells expressing  
139 Flag-tagged luminal domain (LD) and full-length C2-19K and D8-19K were fixed with PFA and  
140 immunostained for Flag. Flag expression levels were quantified and results displayed in a  
141 scatter plot (n=1888 and 1414 for C2 LD-19K and D8 LD-19K, respectively). Centre line  
142 indicates median and 1<sup>st</sup> and 3<sup>rd</sup> quartiles and whiskers shown as boxes and lines,  
143 respectively. Significance was assessed with two-tailed Wilcoxon non-parametric test. XBP1

144 splicing activity in cells transfected with Flag-tagged luminal domain (LD) or full length (FL)  
145 19K is shown in the third and fourth panels. Results show that the expression of the AdV-D8  
146 19K protein is less effective at inducing XBP1s than AdV-C2 19K. Source data are provided as  
147 a source data file.

148 j. Multiple sequence alignment shows high sequence conservation between C2 and C5 19K of  
149 AdV-C2 and C5 (92%), and considerable variation between C2/5 and D8 19K (30% conserved  
150 residues). Clustal 1.2.4 web server was used to align the sequences.

151



**a** AdV-C5 infection but not replication required for XBP1s induction

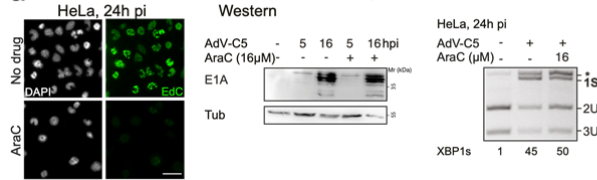

**b** The E1A expression inhibitor FLV blocks XBP1s induction

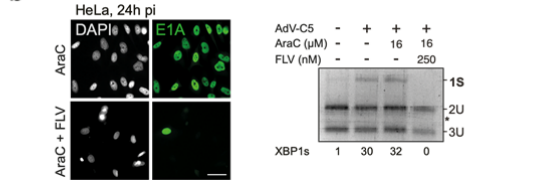

**c** C5-dl327 expresses E1A but not E3-19K

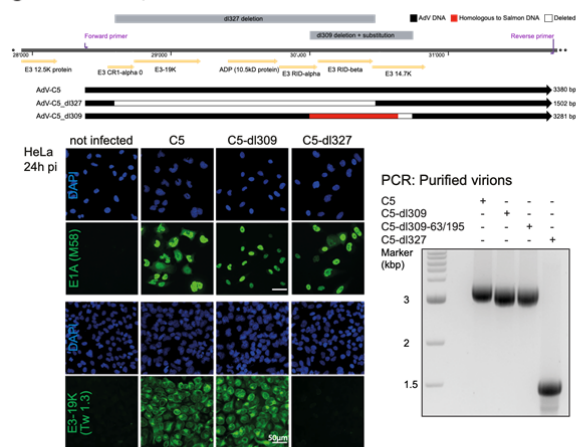

**d** Reduced induction of XBP1s in AdV-C5-ΔE3-19K

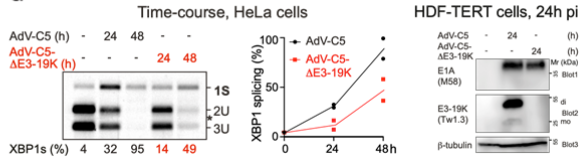

**e** RNAi against E3 and E4 reduces E3-19K and E4-Orf4, and E3 RNAi reduces E1A and XBP1s

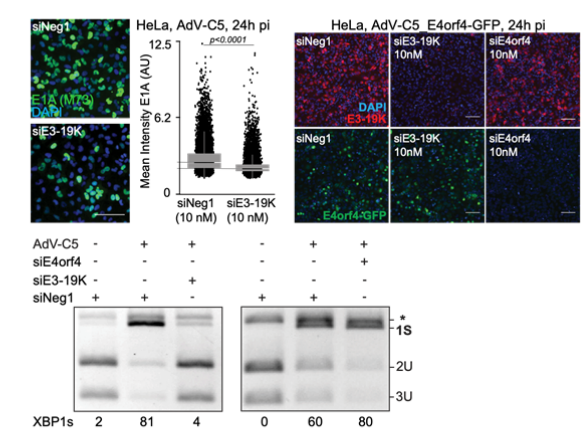

**f** The AdV-C5 E3A expression cassette and E3A mutations

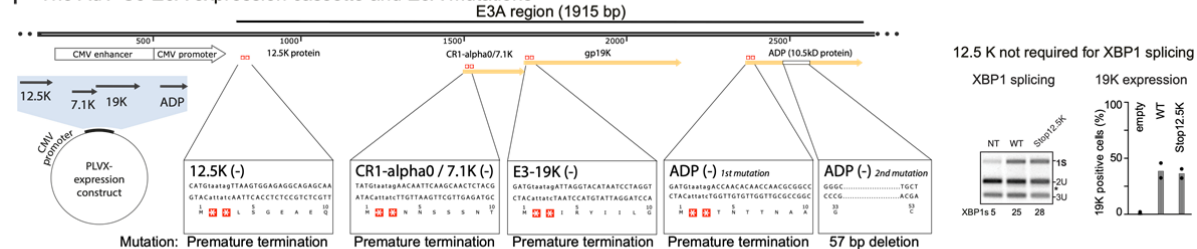

**g** The luminal domain (LD) of C2 E3-19K is required for XBP1s induction

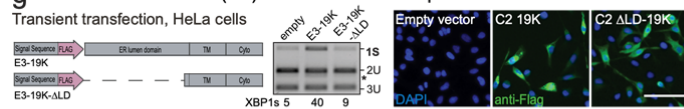

**h** ER retention motif of 19K not required for XBP1 splicing

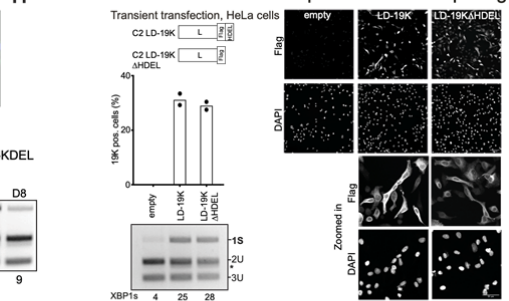

**i** D8 E3-19K poorly induces XBP1s

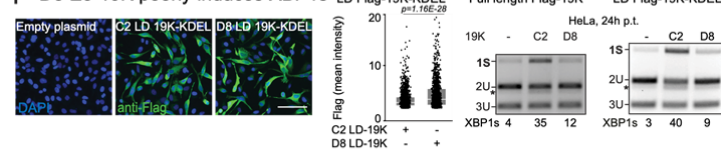

**j** Amino acid sequence alignment of E3-19K

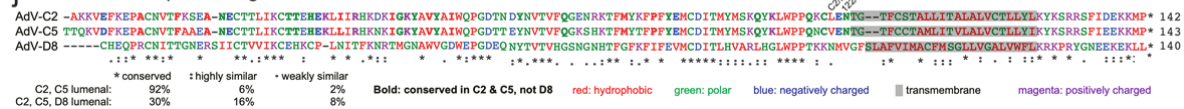

153 **Supplementary Figure 4: Weak interaction of full-length (FL) AdV-D8 19K with**  
154 **Flag-IRE1 $\alpha$  in comparison to 19K of AdV-C2. (Relates to Figure 4).**

155 a. Co-immunoprecipitation of AdV-C2 19K with IRE1 $\alpha$  in stable 19K expressing HEK-293 cells.  
156 Cell lysates were immunoprecipitated with anti-19K (3A9) antibody and immunoblotted with  
157 anti-IRE1 $\alpha$  and anti-19K. Scale bar, 50  $\mu$ m. Two independent experiments gave similar results.

158 b. Full-length 19K, IRE1 $\alpha$  and GFP1-9 constructs used for the split-GFP complementation.  
159 Human embryonic kidney (HEK) 293T cells were seeded for 24 h and transfected with 100 ng  
160 of plasmid DNA encoding AdV-C2 or D8 19K-G10, Flag-IRE1-G11-CD and GFP1-9 for 48 h.  
161 Cells were fixed and stained with 4',6-Diamidin-2-phenylindol (DAPI) and imaged with high-  
162 throughput microscopy. GFP signals from the positive cells were quantified using CellProfiler  
163 and plotted along with the total cell numbers. Zoomed-in regions in top panels show lesser  
164 split-GFP complementation of 19K and IRE1 $\alpha$  with D8 19K compared to C2 19K. Scale bars  
165 are 10 and 100  $\mu$ m for the zoom in and overview images, respectively. The quantification of  
166 GFP signals is shown in the right panel.

167 c. Weaker interaction of D8 19K-LD with IRE1 $\alpha$ -LD than C2 LD-19K. HEK293T cells were  
168 transfected with CMV-mCherry, SS-GFP1-9-HDEL, IRE1a-LD-GFP10 and C2 or D8 19K-LD-  
169 GFP11. Forty-eight hours post transfection, cells were imaged live with high-throughput  
170 spinning disk confocal with 20X objective. Cells were segmented with Cell profiler using  
171 mCherry signal as a mask and split-GFP signal was measured over this mask. Split GFP  
172 intensity in cells that are above the background intensity of GFP are plotted as a scatter plot  
173 here. Expression of C2 and D8 19K-LD-GFP11 was analysed in parallel using SS-GFP1-10-  
174 HDEL plasmid which forms bipartite GFP complementation with proteins tagged with GFP11.  
175 Five hundred random cells per conditions were chosen to make the box plot, with central line  
176 indicating the median and 1<sup>st</sup> and 3<sup>rd</sup> quartiles and whiskers shown as boxes and lines,  
177 respectively. Percentage GFP positive cells are indicated and the test of significance was  
178 performed using Wilcoxon non-parametric test.

179

**a** Co-immunoprecipitation of IRE1 $\alpha$  with C2-19K

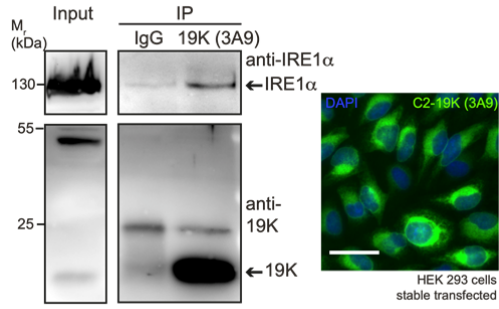

**b** Interaction of C2 but not D8 full length 19K with Flag-IRE1 $\alpha$

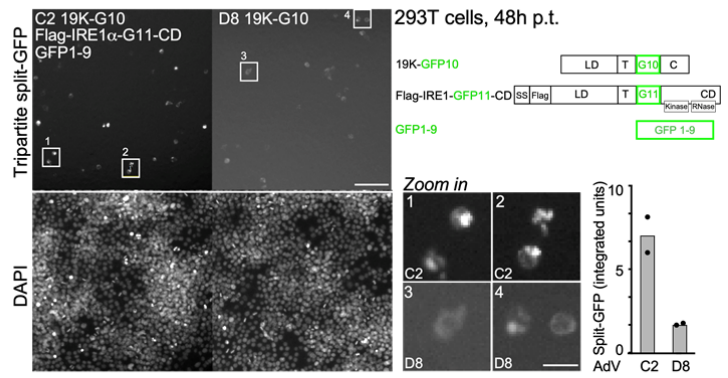

**c** Interaction of IRE1 $\alpha$ -LD with C2 not D8 19K-LD

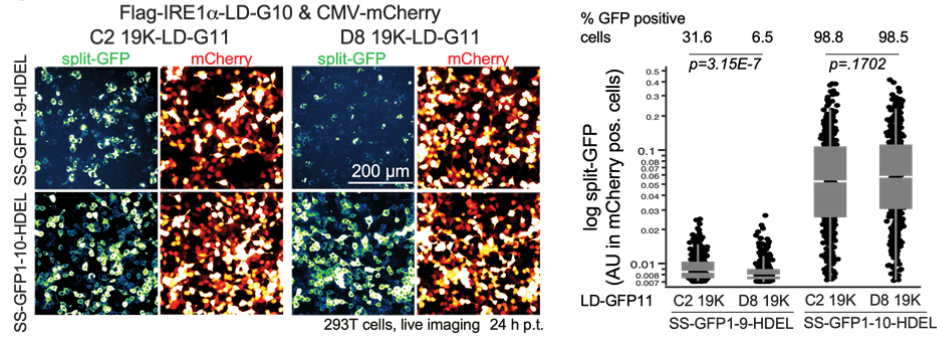

180  
181

182 **Supplementary Figure 5: Expression vectors of murine XBP1, plasmid copy**  
183 **numbers for the E1A transcription reporter assays, knock-down of IRE1 $\alpha$  and**  
184 **XBP1 by RNAi, live cell assay demonstrating the suppression of AdV gene**  
185 **expression in persistence, and cytopathic effects of IRE1 $\alpha$  nuclease inhibition**  
186 **and XBP1 RNAi in HDF-TERT cells. (Relates to Figure 5).**

187 a. Lentiviruses encoding murine XBP1s. Schematics showing the domains of murine XBP1s in  
188 wild-type (cl8) and mutant (cl7) constructs encoding full length XBP1s and XBP1s devoid of  
189 the activation domain, respectively. Middle panel shows the expression of XBP1s mRNA from  
190 both of the constructs. Note that the protein expression of full-length XBP1s is seen only in the  
191 wild-type construct. The bottom panels show the increase in AdV-C2 E1A levels in cl8  
192 expressing HeLa I-KO cells, not in the cl7 expressing cells. Three independent experiments  
193 gave similar results.

194 b. Knock-down efficiency of IRE1 $\alpha$  and XBP1 upon RNAi (siTools, 20 nM) in HDF-TERT cells.  
195 Quantitative reverse transcriptase (qRT) PCR of total IRE1 $\alpha$  and XBP1 mRNA levels in  
196 siIRE1 $\alpha$  and siXBP1 transfected HDF-TERT cells 72 h post transfection relative to the non-  
197 targeting control siPools (siNeg1). Data represent the means from two independent  
198 experiments.

199 c. Suppression of AdV-C5\_GFP-E4orf4 expression in IFN- $\gamma$  treated HDF-TERT cells in long-  
200 term persistence. Cells were seeded onto 96-well imaging plates for 24 h, incubated with IFN- $\gamma$   
201 for 24 h and infected with AdV-C5\_GFP-E4orf4 at 37°C for 1 h. Unbound virus was washed  
202 out and cells were incubated with IFN- $\gamma$  with subsequent replacement of IFN- $\gamma$  every 5 days.  
203 Representative images from parallel samples show cells fixed 14 days pi, stained with DAPI  
204 and imaged with high-throughput microscopy. Scale bars are 500  $\mu$ m. Right panel shows  
205 percentage of GFP-E4orf4 expressing cells in IFN- $\gamma$  treated and untreated cells from a replica  
206 experiment, imaged live at indicated times points and quantified with Cell Profiler. Data  
207 represent the means from two technical replicates. Two independent experiments gave similar  
208 results.

209 d. Impedance measurements with xCELLigence showing effects of 4 $\mu$ 8C and XBP1 RNAi on  
210 HDF-TERT cells. Cells were seeded onto xCELLigence E-16 plates for 24 h, and either  
211 transfected with RNAi against XBP1, non-targeting control siRNA (siNeg1, 20 nM each) or  
212 incubated with 4 $\mu$ 8C (0.1 mM). Live cell impedance measurements were taken at intervals of  
213 15 minutes. Drug was washed out 7 days post incubation, and impedance measurements  
214 were continued for another 5 days. Data represent the means  $\pm$  SD from three technical  
215 replicates. Two independent experiments gave similar results.

**a** Expression of lentivirus encoded muXBP1s

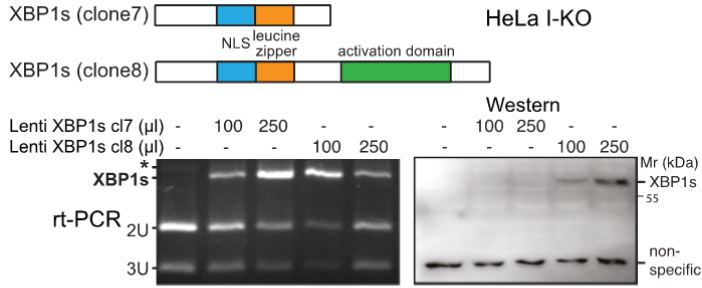

No induction of E1A by XBP1s lacking the activation domain

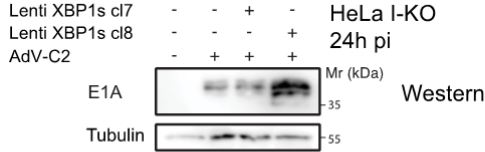

**b** RNAi knock-down of IRE1α & XBP1

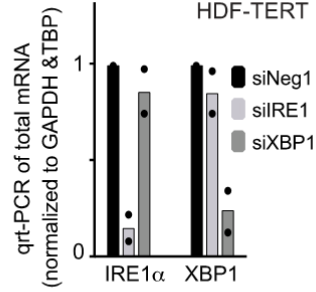

**c** IFN-γ suppresses AdV-C5\_GFP-E4orf4 expression  
Infected HDF-TERT

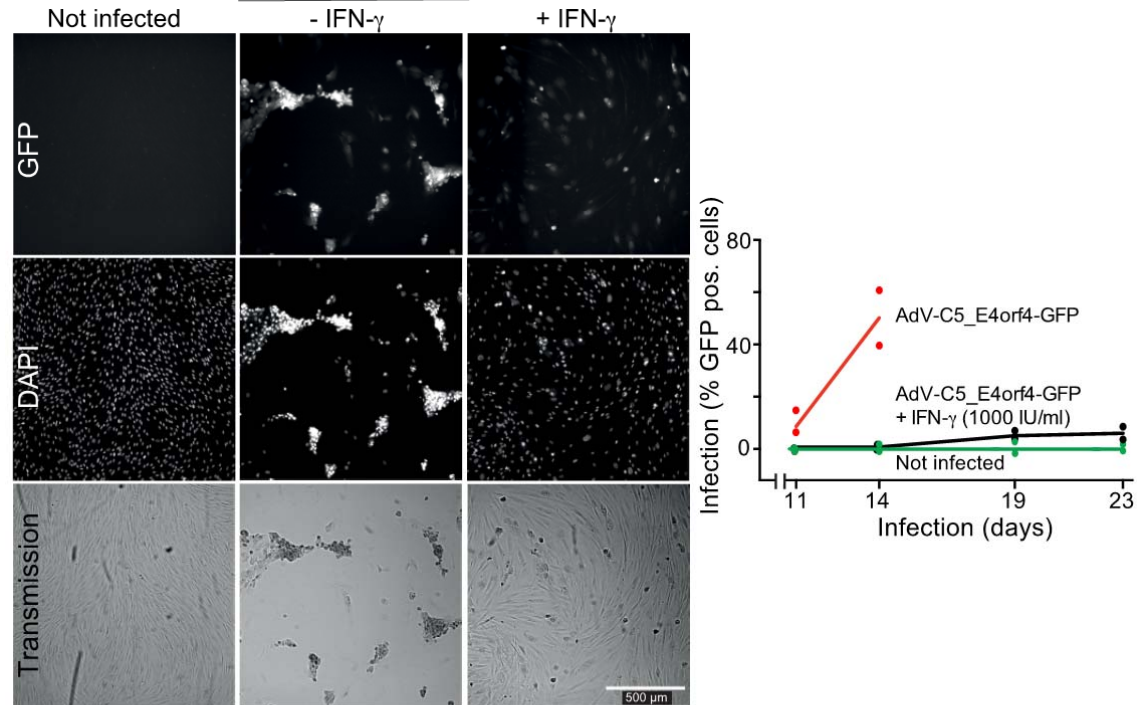

**d** Cytopathic effects of 4μ8C & XBP1 interference

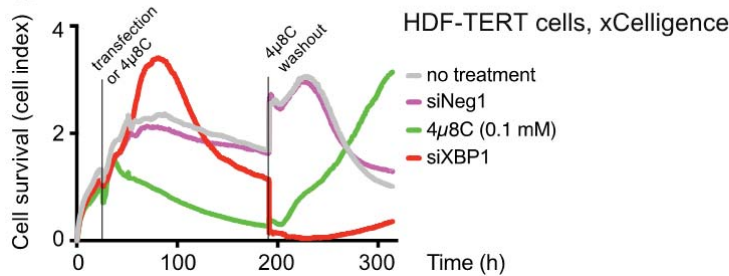

219 **Supplementary Figure 6: XBP1s binding sites on the E1A enhancer/promoter**  
 220 **region increase AdV lytic replication and cytopathic effects. (Relates to Figure 6).**

221 a. C5-dl309 and AdV-C5 replicates more efficiently than dl309- $\Delta$ 63-195 and AdV-C5-XBP1s-  
 222 mut, respectively. HDF-TERT cells were seeded onto xCELLigence E-16 plates for 84 h, and  
 223 infected with C5-dl309 or C5-dl309- $\Delta$ 63-195 and AdV-C5 or AdV-C5-XBP1s-mut viruses at  
 224 37°C for 1 h (MOI 200 each), and unbound virus was removed by washing cells with medium.  
 225 Viral DNA copy numbers in the supernatant were calculated using qPCR at 216 h pi (or 300 h  
 226 post seeding). Data are represented as mean from two technical replicates. Two independent  
 227 experiments gave similar results.

228 b. C5-dl309 and AdV-C5 is more cytopathic than C5-dl309- $\Delta$ 63-195 and AdV-C5-XBP1s-mut,  
 229 respectively. Cell viability of the cells from (A) was determined with xCELLigence in 15 min  
 230 intervals at MOI 200 each. (Also relates to Figure 7). Data are represented as mean +/- SD  
 231 from three technical replicates. Two independent experiments gave similar results.

232

233 a AdV wild type in E1A replicate higher than  
 dl309- $\Delta$ 63-195 and AdV-C5-XBP1s-mut

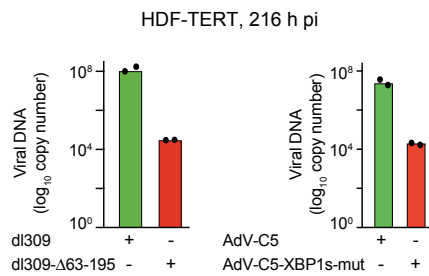

233 b AdV wild type in E1A is more cytopathic than dl309- $\Delta$ 63-195 and  
 AdV-C5-XBP1s-mut

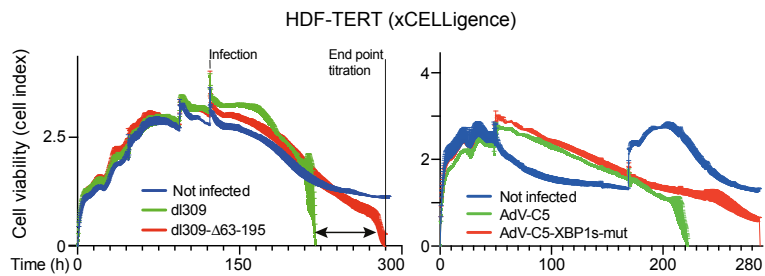

234

235

236

237

237 **Supplementary Figure 7: RNA interference against IRE1 $\alpha$  and XBP1 inhibits AdV**  
 238 **infection of HDF-TERT cells, and the E1A enhancer/promoter augments AdV**  
 239 **infection of HDF-TERT cells. (Relates to Figure 7).**

240 a. RNAi against IRE1 $\alpha$  and XBP1 inhibit AdV infection. HDF-TERT cells were transfected with  
 241 siRNA (20nM, siPools) against IRE1 $\alpha$  and XBP1 or non-targeting control (siNeg1) for 48 h,  
 242 followed by infection with AdV-C2 (MOI 240) for 72 h. Cells were fixed and stained for AdV late  
 243 protein VI and DAPI. Scale bar, 100  $\mu$ m. Two independent experiments gave similar results.

244 b. E1A and protein VI expressions in long-term persistent C5-dl309 and C5-dl309- $\Delta$ 63-195  
 245 infected cells (MOI 200 each). Representative images showing E1A and protein VI  
 246 expressions in dl309 (IFN- $\gamma$ -treated) and dl309- $\Delta$ 63-195 (IFN- $\gamma$  treated or drug-free) infected  
 247 HDF-TERT cells. Experimental conditions were as described in Figure 7c, but IFN- $\gamma$  treated  
 248 cells were fixed at 420 h and 870 h pi (IFN- $\gamma$  washout at 546 h pi), stained for E1A (M58) or  
 249 protein VI and imaged with high-throughput microscopy. Scale bar, 100  $\mu$ m. Two independent  
 250 experiments gave similar results.

**a** siIRE1 $\alpha$  & siXBP1 inhibit AdV infection

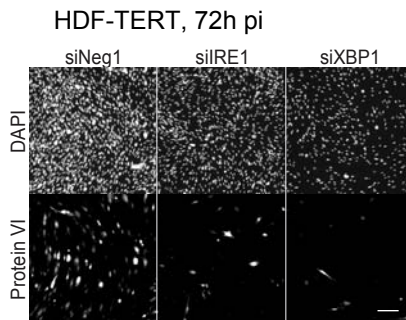

**b** E1A & protein VI expression in long term-persistent dl309 & dl309- $\Delta$ 63-195 infections of HDT-TERT cells

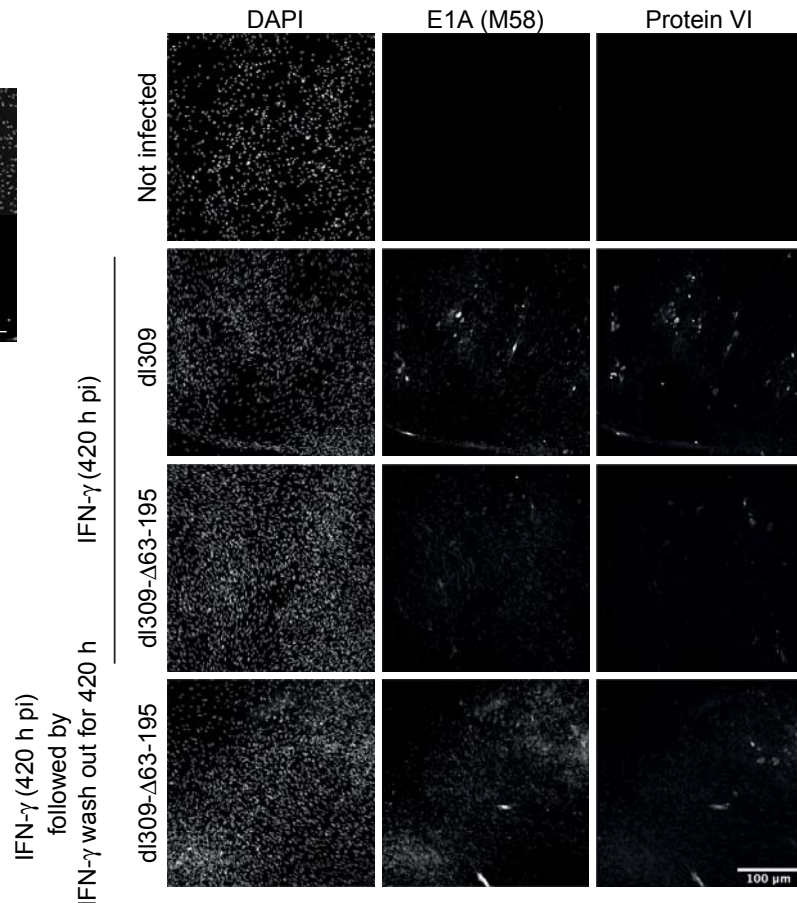

251  
 252

253 **Supplementary Tables**254 **Supplementary Table 1: Table of reagents**

| REAGENT or RESOURCE                                                                                                                        | SOURCE                                                                                             | IDENTIFIER                                                                                                          |
|--------------------------------------------------------------------------------------------------------------------------------------------|----------------------------------------------------------------------------------------------------|---------------------------------------------------------------------------------------------------------------------|
| <b>Antibodies</b>                                                                                                                          |                                                                                                    |                                                                                                                     |
| Anti-hexon (mab 9C12)<br><br>Dilution for immunofluorescence was 1:40 from hybridoma culture supernatant.                                  | L. Fayadat-Dilman/W. Olijve University of Iowa, Developmental Studies Hybridoma Bank; <sup>1</sup> | <a href="https://doi.org/10.1128/JVI.78.22.12320-12332.2004">https://doi.org/10.1128/JVI.78.22.12320-12332.2004</a> |
| Anti-E1A (M58)<br><br>Dilution for immunofluorescence 1:150 and for immunoblotting 1:1000 from 50% glycerol diluted batch.                 | ThermoFisher Scientific                                                                            | Cat #MA5-13643                                                                                                      |
| Anti-E1A (M73)<br><br>Dilution for immunofluorescence 1:150 and for immunoblotting 1:1000 from 50% glycerol diluted batch.                 | Millipore                                                                                          | Cat #05-599                                                                                                         |
| Anti-E3-19K (3A9)<br><br>Dilution for immunofluorescence and immunoprecipitation was undiluted from hybridoma culture supernatant.         | <sup>2</sup>                                                                                       | <a href="https://doi.org/10.1016/j.molimm.2008.06.019">https://doi.org/10.1016/j.molimm.2008.06.019</a>             |
| Anti-E3-19K (Tw1.3)<br><br>Dilution for immunofluorescence and immunoprecipitation was undiluted from hybridoma culture supernatant.       | <sup>3</sup>                                                                                       | <a href="https://doi.org/10.1084/jem.174.6.1629">https://doi.org/10.1084/jem.174.6.1629</a>                         |
| Anti-protein VI<br><br>Dilution for immunofluorescence was 1:1000 from purified antibody stock.                                            | <sup>4</sup>                                                                                       | <a href="https://doi.org/10.1016/j.chom.2011.07.006">https://doi.org/10.1016/j.chom.2011.07.006</a>                 |
| Anti-IRE1 $\alpha$ (14C10)<br><br>Dilution for immunoblotting was 1:1000.                                                                  | Cell Signaling                                                                                     | <a href="#">Cat #3294</a>                                                                                           |
| Anti-hXBP1s (human XBP1s)<br><br>Concentration for immunoprecipitation was 1.5 $\mu$ g per sample. Dilution for immunoblotting was 1:1000. | BioLegend                                                                                          | <a href="#">Cat #619502</a>                                                                                         |



|                                                                                                                   |                                 |                                                                                                         |
|-------------------------------------------------------------------------------------------------------------------|---------------------------------|---------------------------------------------------------------------------------------------------------|
| Anti-Flag<br>Concentration for immunoprecipitation was 0.75µg per sample. Dilution for immunoblotting was 1:1000. | Sigma                           | <a href="#">Cat #F7425</a>                                                                              |
| Anti-β-tubulin<br>Dilution for immunoblotting was 1:1000.                                                         | Amersham                        | <a href="#">Cat #N.357</a>                                                                              |
| Anti-PERK<br>Dilution for immunoblotting was 1:1000.                                                              | Cell Signaling                  | <a href="#">Cat #3192</a>                                                                               |
| Anti-BiP<br>Dilution for immunoblotting was 1:1000.                                                               | Kind gift by Dr. Ineke Braakman | <a href="#">N/A</a>                                                                                     |
| <b>Virus Strains</b>                                                                                              |                                 |                                                                                                         |
| AdV-C2                                                                                                            | 5                               | <a href="https://doi.org/10.1016/0092-8674(93)90382-Z">https://doi.org/10.1016/0092-8674(93)90382-Z</a> |
| AdV-C5                                                                                                            | 6                               | <a href="https://doi.org/10.1128/JVI.03391-12">https://doi.org/10.1128/JVI.03391-12</a>                 |
| AdV-C5-dI309                                                                                                      | 7                               | N/A                                                                                                     |
| AdV-C5-dI309-Δ63-195                                                                                              | 7                               | N/A                                                                                                     |
| AdV-C5-dI327                                                                                                      | 8                               | N/A                                                                                                     |
| AdV-C2_dE3B-mCherry                                                                                               | this paper                      | Deletion of E3B region of AdV-C2 and insertion of mCherry construct under CMV promoter                  |
| AdV-C5-dE3-19K                                                                                                    | this paper                      | Deletion of E3-19K gene in AdV-C5 corresponding to genomic region 28739-29217.                          |
| <b>Chemicals, Peptides, Recombinant Proteins</b>                                                                  |                                 |                                                                                                         |
| 4µ8C                                                                                                              | Calbiochem                      | Cat #412512                                                                                             |
| Interferon-gamma (IFN-γ)                                                                                          | Peptotech                       | Cat #300-02                                                                                             |
| Protein A sepharose                                                                                               | Abcam                           | Cat #ab193256                                                                                           |
| Protein A agarose/Salon sperm DNA slurry (50%)                                                                    | Merck                           | Cat #16-157                                                                                             |
| Rabbit IgG isotype control                                                                                        | Thermo Fischer Scientific       | Cat #02-6102                                                                                            |
| Lipofectamine 2000 RNAiMAX                                                                                        | Invitrogen                      | Cat #13778150                                                                                           |
| Lipofectamine 2000                                                                                                | Invitrogen                      | Cat #11668-027                                                                                          |
| Optimem low-serum medium                                                                                          | Thermo Fischer Scientific       | Cat #11058021                                                                                           |
| T7 Endonuclease                                                                                                   | New England Biolabs             | Cat #E3321                                                                                              |

|                                                     |                            |                                                                                                                                         |
|-----------------------------------------------------|----------------------------|-----------------------------------------------------------------------------------------------------------------------------------------|
| Protease Inhibitor Cocktail Tablets                 | Roche                      | Cat #11836153001                                                                                                                        |
| Blood and Tissue DNA extraction kit                 | Qiagen                     | Cat #69504                                                                                                                              |
| NEBuilder® HiFi DNA assembly cloning kit            | New England Biolabs        | Cat #E5520S                                                                                                                             |
| Q5® Site-Directed Mutagenesis kit                   | New England Biolabs        | Cat #E0554S                                                                                                                             |
| 4-20% Mini-PROTEAN® precast protein gels            | Bio-Rad                    | Cat #4561096                                                                                                                            |
| Phos-tag AAL-107M                                   | Fujifilm WAKO              | Cat #WA3 300-93523                                                                                                                      |
| FastAP Alkaline phosphatase                         | Thermo Fischer Scientific  | Cat #EF0652                                                                                                                             |
| <b>Experimental Models, Cell Lines</b>              |                            |                                                                                                                                         |
| Human: HeLa-ATCC                                    | American Type Cell Culture | <a href="#">Cat #CCL-2</a>                                                                                                              |
| Human: HeLa IRE1 $\square$ -knockout (HeLa I-KO)    | this paper                 |                                                                                                                                         |
| Human: HEK 293T                                     | American Type Cell Culture | Cat #CRL-1573                                                                                                                           |
| Murine: Flag-IRE1 $\square$ -MEFs                   | <sup>9</sup>               | <a href="https://doi.org/10.1073/pnas.1217611110">https://doi.org/10.1073/pnas.1217611110</a>                                           |
| Murine: IRE1 $\square^{-/-}$ MEFs                   | <sup>9</sup>               | <a href="https://doi.org/10.1073/pnas.1217611110">https://doi.org/10.1073/pnas.1217611110</a>                                           |
| Human: HDF-TERT                                     | <sup>10</sup>              | <a href="https://doi.org/10.1006/viro.2001.1204">https://doi.org/10.1006/viro.2001.1204</a>                                             |
| Human: Human corneal epithelium                     | <sup>11</sup>              | <a href="https://iovs.arvojournals.org/article.aspx?articleid=2179804">https://iovs.arvojournals.org/article.aspx?articleid=2179804</a> |
| Human: A549-ATCC                                    | American Type Cell Culture | Cat #CCL-185                                                                                                                            |
| <b>Oligonucleotides</b>                             |                            |                                                                                                                                         |
| Pool of siRNA oligos targeting human IRE1 $\square$ | siTOOLS Biotech            | Custom-made                                                                                                                             |
| Pool of siRNA oligos targeting human XBP1           | siTOOLS Biotech            | Custom-made                                                                                                                             |
| Pool of siRNA oligos targeting AdV-C5 E3-19K ORF    | siTOOLS Biotech            | Custom-made                                                                                                                             |
| Pool of siRNA oligos targeting AdV-C5 E4orf4 ORF    | siTOOLS Biotech            | Custom-made                                                                                                                             |
| <b>Recombinant DNA</b>                              |                            |                                                                                                                                         |
| pLVX-IRES-Puro                                      | Clontech                   | Cat #632183                                                                                                                             |
| pLVX-Ad5-E3A-IRES-Puro                              | this paper                 | Cloned from AdV-C5 having E3A region                                                                                                    |
| pLVX-Ad5-E3A-term12.5K-IRES-Puro                    | this paper                 | Cloned from AdV-C5 having E3A region, and prematurely terminated 12.5K gene                                                             |

|                                    |                   |                                                                                                        |
|------------------------------------|-------------------|--------------------------------------------------------------------------------------------------------|
| pLVX-Ad5-E3A-term7.1K-IRES-Puro    | this paper        | Cloned from AdV-C5 having E3A region, and prematurely terminated 7.1K gene                             |
| pLVX-Ad5-E3A-termE3-19K-IRES-Puro  | this paper        | Cloned from AdV-C5 having E3A region, and prematurely terminated E3-19K gene                           |
| pLVX-Ad5-E3A-termADP-IRES-Puro     | this paper        | Cloned from AdV-C5 having E3A region, and prematurely terminated and transmembrane delete ADP gene     |
| pBS-Ad5-E3 + E3-19K-LTC            | <sup>12</sup>     | <a href="https://doi.org/10.1128/JVI.03391-12">https://doi.org/10.1128/JVI.03391-12</a>                |
| pBS-Ad5-E3 + E3-19K-LTK            | <sup>12</sup>     | <a href="https://doi.org/10.1128/JVI.03391-12">https://doi.org/10.1128/JVI.03391-12</a>                |
| pBS-Ad5-E3 + E3-19K-LKC            | <sup>12</sup>     | <a href="https://doi.org/10.1128/JVI.03391-12">https://doi.org/10.1128/JVI.03391-12</a>                |
| pBS-Ad5-E3 + E3-19K-LKK            | <sup>12</sup>     | <a href="https://doi.org/10.1128/JVI.03391-12">https://doi.org/10.1128/JVI.03391-12</a>                |
| pBS-Ad5-E3 + E3-19K-M87A-LTC       | <sup>12</sup>     | <a href="https://doi.org/10.1128/JVI.03391-12">https://doi.org/10.1128/JVI.03391-12</a>                |
| pSG5                               | Agilent           | Cat # 216201                                                                                           |
| pSG5-CO-AdV-C2-E3-19K              | this paper        | Codon-optimised AdV-C2 E3-19K gene inserted in pSG5 vector                                             |
| pSG5-Ad8-E3-19K                    | this paper        |                                                                                                        |
| pSG5-CO-AdV-C2-E3-19K-LD-Flag-HDEL | this paper        | Codon-optimised AdV-C2 E3-19K luminal domain (LD) with Flag and HDEL sequences inserted in pSG5 vector |
| pSG5-AdV-D8-E3-19K-LD-Flag-HDEL    | this paper        | AdV-D8 E3-19K luminal domain with Flag and HDEL sequences inserted in pSG5 vector                      |
| pcDNA3.1                           | Thermo Scientific | Cat #V79020                                                                                            |

|                                         |            |                                                                                                                                                                                                                               |
|-----------------------------------------|------------|-------------------------------------------------------------------------------------------------------------------------------------------------------------------------------------------------------------------------------|
| pcDNA3.1 + CO-AdV-C2-E3-19K-GFP10       | this paper | Codon-optimised full length AdV-C2 E3-19K with a C-terminal insertion of linker and GFP10 domain. The whole open-reading frame is inserted in pcDNA3.1 vector                                                                 |
| pcDNA3.1 + Flag-IRE1 $\alpha$ -GFP11-CD | this paper | N-terminal Flag-tagged IRE1 $\alpha$ with an insertion of GFP11 domain in the linker region between transmembrane and kinase domains of mammalian IRE1 $\alpha$ . The whole open-reading frame is inserted in pcDNA3.1 vector |
| pcDNA3.1 + Flag-IRE1 $\alpha$ -CD-GFP11 | this paper | N-terminal Flag-tagged IRE1 $\alpha$ with an insertion of GFP11 domain at the extreme C-terminal IRE1 $\alpha$ . The whole open-reading frame is inserted in pcDNA3.1 vector                                                  |
| pcDNA3.1 + GFP1-9                       | this paper | Open reading frame with GFP domains 1-9 inserted in pcDNA3.1 vector                                                                                                                                                           |
| pcDNA3.1 + CSS-GFP1-9-HDEL              | this paper | Open reading frame with GFP domains 1-9, with N-terminal signal sequence and C-terminal HDEL retention signal inserted in pcDNA3.1 vector                                                                                     |

|                                             |            |                                                                                                                                                                |
|---------------------------------------------|------------|----------------------------------------------------------------------------------------------------------------------------------------------------------------|
| pcDNA3.1 + CSS-GFP1-10-HDEL                 | this paper | Open reading frame with GFP domains 1-10, with N-terminal signal sequence and C-terminal HDEL retention signal inserted in pcDNA3.1 vector                     |
| pcDNA3.1 + CSS-Flag-IRE1 $\alpha$ -LD-GFP10 | this paper | N-terminal Flag-tagged IRE1 $\alpha$ luminal domain with an insertion of GFP10 domain at the C-terminal. The open-reading frame is inserted in pcDNA3.1 vector |
| pcDNA3.1 + CSS-Flag-PERK-LD-GFP10           | this paper | N-terminal Flag-tagged PERK luminal domain with an insertion of GFP10 domain at the C-terminal. The open-reading frame is inserted in pcDNA3.1 vector          |
| pcDNA3.1 + CSS-Ad2-E3-19K-LD-GFP11          | this paper | Codon-optimised AdV-C2 E3-19K luminal domain (LD) with an insertion of GFP11 domain at the C-terminal. The open-reading frame is inserted in pcDNA3.1 vector   |
| pcDNA3.1 + CSS-Ad8-E3-19K-LD-GFP11          | this paper | AdV D8 E3-19K luminal domain (LD) with an insertion of GFP11 domain at the C-terminal. The open-reading frame is inserted in pcDNA3.1 vector.                  |
| Lenti CRISPR                                | Addgene    | Cat # 49535                                                                                                                                                    |
| Lenti CRISPR + IRE1 $\alpha$ _guideRNA      | this paper | N/A                                                                                                                                                            |

|                                                              |                          |                                                                                                             |
|--------------------------------------------------------------|--------------------------|-------------------------------------------------------------------------------------------------------------|
| Software and algorithms                                      |                          |                                                                                                             |
| Cell Profiler                                                | 13                       | Version 3                                                                                                   |
| KNIME                                                        | KNIME Analytics Platform | <a href="https://www.knime.org/knime-analytics-platform">https://www.knime.org/knime-analytics-platform</a> |
| JMP                                                          | SAS                      | Version 13                                                                                                  |
| Graphpad Prism: GraphPad Software, Inc., Version 8, La Jolla |                          |                                                                                                             |

255

256

257 **Supplementary Table 2: List of primers**

258

| <b>Primers</b>                                        |               |                           |
|-------------------------------------------------------|---------------|---------------------------|
| XBP1-forward<br>(Splicing assay) –<br>human           | <sup>9</sup>  | AAACAGAGTAGCAGCTCAGACTGC  |
| XBP1-forward<br>(Splicing assay) –<br>mouse           | <sup>9</sup>  | AAACAGAGTAGCAGCGCAGACTGC  |
| XBP1-reverse<br>(Splicing assay) –<br>mouse and human | <sup>9</sup>  | TCCTTCTGGGTAGACCTCTGGGAG  |
| XBP1-forward<br>(qPCR)                                |               | CCCTCCAGAACATCTCCCCAT     |
| XBP1-reverse<br>(qPCR)                                |               | ACATGACTGGGTCCAAGTTGT     |
| XBP1s-forward<br>(qPCR)                               | <sup>14</sup> | TGCTGAGTCCGCAGCAGGTG      |
| XBP1s-reverse<br>(qPCR)                               | <sup>14</sup> | GCTGGCAGGCTCTGGGGAAG      |
| IRE1 $\alpha$ -forward<br>(qPCR)                      | <sup>15</sup> | TGCTTAAGGACATGGCTACCATCA  |
| IRE1 $\alpha$ -reverse<br>(qPCR)                      | <sup>15</sup> | CTGGAACTGCTGGTGCTGGA      |
| E1A-forward (ChIP)                                    | this paper    | GGTGGAGTTTGTGACGTGG       |
| E1A-forward (ChIP)                                    | this paper    | CGCGCGAAAATTGTCACTTC      |
| E4-forward (ChIP)                                     | this paper    | GGTGGAGTTTGTGACGTGG       |
| E4-reverse (ChIP)                                     | this paper    | AAAGGGCCAAGTACAGAGCG      |
| MLP-forward (ChIP)                                    | this paper    | TCTTCGGCATCAAGGAAGGT      |
| MLP-reverse (ChIP)                                    | this paper    | GAGTACTCACCCCAACAGCT      |
| E1A-forward (qPCR)                                    | <sup>16</sup> | TCCGGTCCTTCTAACACACC      |
| E1A-reverse (qPCR)                                    | <sup>16</sup> | GGCGTTTACAGCTCAAGTCC      |
| PDK1-forward<br>(genome copy<br>number/ChIP)          | <sup>17</sup> | CGCCCTGTCCTTGAGCC         |
| PDK1-reverse<br>(genome copy<br>number/ChIP)          | <sup>17</sup> | CGGTATGGAGCGTCCCCT        |
| GAPDH-forward<br>(qPCR)                               |               | GACGCTGGGGCTGGCATTG       |
| GAPDH-reverse<br>(qPCR)                               |               | GCTGGTGGTCCAGGGGTC        |
| TBP-forward (qPCR)                                    |               | GCCAGCTTCGGAGAGTTCTGGGATT |
| TBP-reverse (qPCR)                                    |               | CGGGCACGAAGTGCAATGGTCTTTA |
| E1A-forward (RT-<br>PCR)                              | this paper    | TTGAGTGCCAGCGAGTAGAG      |
| E1A-forward (RT-<br>PCR)                              | this paper    | GGCGTTTACAGCTCAAGTCC      |

259

260

261

262 **Supplementary Table 3: List of raw data used in the figures deposited at**  
 263 **Mendeley Data**

| Figure           | CellProfiler Script                   | KNIME workflow                   | Dataset Name                     | Size   | Reserved DOI          |
|------------------|---------------------------------------|----------------------------------|----------------------------------|--------|-----------------------|
| 1A-pVI-HeLa-IKO  | Nuclear-Signal-Measurement.cpproj     | Infection_Percentage_Generic.zip | Fig-1A-pVI-HeLa-ICK.zip          | 2.13GB | 10.17632/fr78y63zz.1  |
| 3C               | E3-19K-expression.cpproj              | Infection_Percentage_Generic.zip | Fig-3B-E3-19K.zip                | 1.54GB | 10.17632/fr78y63zz.1  |
| 3D               | E3-19K-expression.cpproj              | Infection_Percentage_Generic.zip | Fig-3C-E3-19K.zip                | 1.91GB | 10.17632/fr78y63zz.1  |
| 4B               | split-GFP-3.cpproj                    | Infection_Percentage_Generic.zip | Fig-4B.zip                       | 97MB   | 10.17632/fr78y63zz.1  |
| 5A-pVI           | Nuclear-Signal-Measurement.cpproj     | Infection_Percentage_Generic.zip | Fig-5A-pVI.zip                   | 262MB  | 10.17632/fr78y63zz.1  |
| 5A-E3-19K        | E3-19K-expression.cpproj              |                                  | Fig-5A-E3-19K.zip                | 655MB  | 10.17632/fr78y63zz.1  |
| 5B-first-panel   | Nuclear-Signal-Measurement.cpproj     | Infection_Percentage_Generic.zip | Fig-5b-HATC-hXBP1-4u8c.zip       | 403MB  | 10.17632/fr78y63zz.1  |
| 5B-second-panel  | Nuclear-Signal-Measurement-HDF.cpproj | Infection_Percentage_Generic.zip | Fig-5b-HDF-IFN-silRE1-siXBP1.zip | 589MB  | 10.17632/fr78y63zz.1  |
| 5B-third-panel   | Nuclear-Signal-Measurement-HDF.cpproj | Infection_Percentage_Generic.zip | Fig-5b-HDF-lenti-hXBP1-4u8c.zip  | 1.83GB | 10.17632/vzsw4r33dg.1 |
| 6C               | Nuclear-Signal-Measurement.cpproj     |                                  | Fig-6C.zip                       | 765MB  | 10.17632/vzsw4r33dg.1 |
| 7A               | Nuclear-Signal-Measurement-HDF.cpproj | Infection_Percentage_Generic.zip | Fig-7A.zip                       | 1.01GB | 10.17632/vzsw4r33dg.1 |
| 7B               | Nuclear-Signal-Measurement-HDF.cpproj |                                  | Fig-7B.zip                       | 859MB  | 10.17632/vzsw4r33dg.1 |
| S1C              | vDNA-nuclear-import-percentage.cpproj |                                  | Fig-S1C.zip                      | 2.6MB  | 10.17632/vzsw4r33dg.1 |
| 3B               | Nuclear-Signal-Measurement.cpproj     |                                  | Fig-S3D.zip                      | 640MB  | 10.17632/vzsw4r33dg.1 |
| S3H              | E3-19K-expression.cpproj              | Infection_Percentage_Generic.zip | Fig-S3G.zip                      | 418MB  | 10.17632/4d6d2g2kk7.1 |
| S3I              | E3-19K-expression.cpproj              |                                  | Fig-S3H.zip                      | 167MB  | 10.17632/vzsw4r33dg.1 |
| S4B              | split-GFP.cpproj                      |                                  | Fig-S4.zip                       | 1.02GB | 10.17632/vzsw4r33dg.1 |
| S4C              | split-GFP-mCherry-relative.cpproj     | Infection_Percentage_Generic.zip | Fig-S4C.zip                      | 689MB  | 10.17632/4d6d2g2kk7.1 |
| S5C-second-panel | Nuclear-Signal-Measurement-HDF.cpproj | Infection_Percentage_Generic.zip | Fig-S5D                          | 8.53GB | 10.17632/4d6d2g2kk7.1 |

264  
265



266 **Supplementary Table 4: List of the scripts deposited at Mendeley Data**

| CellProfiler                          |                       |
|---------------------------------------|-----------------------|
| Name                                  | DOI                   |
| E3-19K-expression-10x.cpproj          | 10.17632/7pfhksrd4v.1 |
| E3-19K-expression.cpproj              | 10.17632/7pfhksrd4v.1 |
| Nuclear-Signal-Measurement-HDF.cpproj | 10.17632/7pfhksrd4v.1 |
| Nuclear-Signal-Measurement.cpproj     | 10.17632/7pfhksrd4v.1 |
| split-GFP.cpproj                      | 10.17632/7pfhksrd4v.1 |
| vDNA-nuclear-import-percentage.cpproj | 10.17632/7pfhksrd4v.1 |
| Split-GFP-3.cpproj                    | 10.17632/7pfhksrd4v.1 |
| E3-19K-expression-2.cpproj            | 10.17632/7pfhksrd4v.1 |
| split-GFP-mCherry-relative.cpproj     | 10.17632/7pfhksrd4v.1 |
| KNIME Workflow                        |                       |
| Infection_Percentage_Generic.zip      | 10.17632/7pfhksrd4v.1 |

267  
268

269 Lead contact for requesting reagent and resources is Urs F. Greber ([urs.greber@mls.uzh.ch](mailto:urs.greber@mls.uzh.ch))

270

271 **Supplementary references**

272  
273

- 274 1. Varghese, R., Mikiyas, Y., Stewart, P. L. & Ralston, R. Postentry neutralization of  
275 adenovirus type 5 by an antihexon antibody. *J. Virol.* **78**, 12320–12332 (2004).
- 276 2. Menz, B., Sester, M., Koebernick, K., Schmid, R. & Burgert, H.-G. Structural analysis of  
277 the adenovirus type 2 E3/19K protein using mutagenesis and a panel of conformation-  
278 sensitive monoclonal antibodies. *Molecular Immunology* **46**, 16–26 (2008).
- 279 3. Cox, J. H., Bennink, J. R. & Yewdell, J. W. Retention of adenovirus E19 glycoprotein in  
280 the endoplasmic reticulum is essential to its ability to block antigen presentation. *J. Exp.*  
281 *Med.* **174**, 1629–1637 (1991).
- 282 4. Burckhardt, C. J. *et al.* Drifting motions of the adenovirus receptor CAR and immobile  
283 integrins initiate virus uncoating and membrane lytic protein exposure. *Cell Host Microbe*  
284 **10**, 105–117 (2011).
- 285 5. Greber, U. F., Willetts, M., Webster, P. & Helenius, A. Stepwise dismantling of  
286 adenovirus 2 during entry into cells. *Cell* **75**, 477–486 (1993).
- 287 6. Prasad, V. *et al.* Chemical induction of unfolded protein response enhances cancer cell  
288 killing through lytic virus infection. *J. Virol.* **88**, 13086–13098 (2014).
- 289 7. Hatfield, L. & Hearing, P. Redundant elements in the adenovirus type 5 inverted terminal  
290 repeat promote bidirectional transcription in Vitro and are important for virus growth in  
291 Vivo. *Virology* **184**, 265–276 (1991).
- 292 8. Thimmappaya, B., Weinberger, C., Schneider, R. J. & Shenk, T. Adenovirus VAI RNA is  
293 required for efficient translation of viral mRNAs at late times after infection. *Cell* **31**, 543–  
294 551 (1982).
- 295 9. Volmer, R., van der Ploeg, K. & Ron, D. Membrane lipid saturation activates  
296 endoplasmic reticulum unfolded protein response transducers through their  
297 transmembrane domains. *Proc. Natl. Acad. Sci. U.S.A.* **110**, 4628–4633 (2013).

- 298 10. Yu, J., Boyapati, A. & Rundell, K. Critical Role for SV40 Small-t Antigen in Human Cell  
299 Transformation. *Virology* **290**, 192–198 (2001).
- 300 11. Araki-Sasaki, K. *et al.* An SV40-immortalized human corneal epithelial cell line and its  
301 characterization. *Invest. Ophthalmol. Vis. Sci.* **36**, 614–621 (1995).
- 302 12. Sester, M., Ruzsics, Z., Mackley, E. & Burgert, H.-G. The transmembrane domain of the  
303 adenovirus E3/19K protein acts as an endoplasmic reticulum retention signal and  
304 contributes to intracellular sequestration of major histocompatibility complex class I  
305 molecules. *J. Virol.* **87**, 6104–6117 (2013).
- 306 13. Carpenter, A. E. *et al.* CellProfiler: image analysis software for identifying and  
307 quantifying cell phenotypes. *Genome Biol.* **7**, R100 (2006).
- 308 14. van Schadewijk, A., van't Wout, E. F. A., Stolk, J. & Hiemstra, P. S. A quantitative  
309 method for detection of spliced X-box binding protein-1 (XBP1) mRNA as a measure of  
310 endoplasmic reticulum (ER) stress. *Cell Stress and Chaperones* **17**, 275–279 (2012).
- 311 15. van Galen, P. *et al.* The unfolded protein response governs integrity of the  
312 haematopoietic stem-cell pool during stress. *Nature* **510**, 268–272 (2014).
- 313 16. Radko, S., Jung, R., Olanubi, O. & Pelka, P. Effects of Adenovirus Type 5 E1A Isoforms  
314 on Viral Replication in Arrested Human Cells. **10**, e0140124 (2015).
- 315 17. Chen, X. *et al.* XBP1 promotes triple-negative breast cancer by controlling the HIF1 $\alpha$   
316 pathway. *Nature* **508**, 103–107 (2014).
- 317
