# Supplementary material for: The UPR sensor IRE1α and the adenovirus E3-19K glycoprotein sustain persistent and lytic infections
Source: PubMed Central journal article supplement (PMC7181865; doi:10.1038/s41467-020-15844-2), 2020-04-24
Supplement: 41467_2020_15844_MOESM2_ESM.pdf [file 41467_2020_15844_MOESM2_ESM.pdf]

Editorial Note: This manuscript has been previously reviewed at another journal that is not operating a transparent peer review scheme. This document only contains reviewer comments and rebuttal letters for versions considered at Nature Communications .

Reviewers' Comments:

Reviewer #4:

Remarks to the Author:

Review on the manuscript 'The UPR sensor IRE1alpha and the adenovirus E3-19K glycoprotein sustain persistent and lytic infections' by Prasad et al..

The authors have addressed the critical comments by all reviewers. I recommend accepting this manuscript. It is very interesting work and it was much improved by the extensive revisions.

## REVIEWERS' COMMENTS:

### Reviewer #4 (Remarks to the Author):

Review on the manuscript 'The UPR sensor IRE1alpha and the adenovirus E3-19K glycoprotein sustain persistent and lytic infections' by Prasad et al..

The authors have addressed the critical comments by all reviewers. I recommend accepting this manuscript. It is very interesting work and it was much improved by the extensive revisions.

**AU: thanks for these comments**
